# Supplementary material for: Combination therapy targeting toll like receptors 7, 8 and 9 eliminates large established tumors
Source: PubMed Central journal article supplement (PMC4075973; doi:10.1186/2051-1426-2-12), 2014-05-13

Supplemental Figure 3

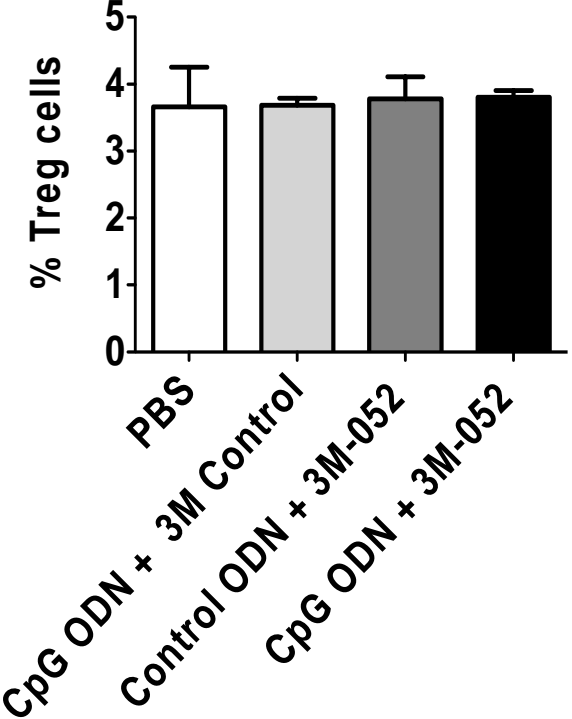

Supplement: 2051-1426-2-12-S4.pdf [file 2051-1426-2-12-S4.pdf]
